# Supplementary material for: A rapid scoping review of evaluability assessment frameworks for health and care service delivery innovations
Source: Research Square preprint supplement (doi:10.21203/rs.3.rs-6354300/v1), 2025-05-08
Supplement: Supplementary file 1 [file d308e0c7f73a18e3fb97cf48.docx]

**Text 1. The search strategy used for searching Ovid MEDLINE(R)**

1 exp consensus/ 23812

2 exp consensus development conference/ 12853

3 exp consensus development conferences as topic/ 3012

4 exp guideline/ 39415

5 guidelines as topic/ 42347

6 (guideline or consensus development conference).pt. 28171

7 consensus*.ti,kf. 39076

8 consensus*.ab. /freq=2 38644

9 exp Decision Support Techniques/ 83541

10 (algorithm* or standards or guideline or guidance or framework or checklist or decision tool or recommendation or pathway*).ti,ab,kf. 2857147

11 (Program Evaluation/ or Evaluation Studies as Topic/ or evaluation.ti,ab,kf.) adj3 (readiness or preparedness or practicality or planning or exploratory).ti,ab. 10845

12 evaluability.ti,ab,kf. 308

13 scalability.ti,ab,kf. 13210

14 1 or 2 or 3 or 4 or 5 or 6 or 7 or 8 or 9 or 10 3039276

15 11 or 12 or 13 24348

16 14 and 15 5473

17 limit 16 to english language 5376

**Table S1. Details of mapping the included frameworks into the components**

| **Framework identification** | **Evaluation context** | **Health or care problem addressed** | **Evaluation questions or objectives** | **Innovation description** | **Theory of change** | **Innovation maturity** | **Implementation readiness** | **Scope/boundaries of evaluations** | **Outcome indicators** | **Stakeholder engagement** | **Research designs and methods specification** | **Data & data availability** | **Resources available** | **Research governance including approval** | **Evaluation monitoring** | **Evaluation team and capacity** | **Feedback findings** | **Risk analysis of potential concerns** | **Health equity** | **Others** | **Comments** |
| --- | --- | --- | --- | --- | --- | --- | --- | --- | --- | --- | --- | --- | --- | --- | --- | --- | --- | --- | --- | --- | --- |
| American Institutes for Research evaluability assessment framework | NA | NA | Programme objectives established by reviewing relevant documents | NA | Causal assumptions | NA | NA | NA | Readily available indicators of intended activity or intended outcomes | Interview key programme managers and stakeholders (defining programme objectives) | NA | Identify and review documents | NA | NA | Monitor the activities occurring; revisit management and evaluation options | NA | NA | Manage discrepancies identified | NA | NA |  |
| CDA Collaborative Learning Projects | NA | NA | Noted, unspecified | NA | Clarify programme logic/theory of change/results chain | NA | NA | Define focus, purpose, boundaries of evaluability assessment | NA | Interview stakeholders, including those who implement programme | NA | Identify and review documents | NA | NA | NA | NA | Draw conclusions and make recommendations including change needs and alternative evaluation designs | NA | NA | Programme plausibility | |
| Holvoet evaluability assessment framework | Broader context | Underlying analysis | NA | NA | Theory of change and its consistency and adaptation | NA | NA | NA | Monitoring and evaluation system | Describe the role of the stakeholders and attitude | NA | Availability of intervention implementation information | Monitoring and evaluation system | NA | Monitoring and evaluation system | Monitoring and evaluation system | NA | Monitoring and evaluation system | NA | NA |  |
| Thurston 6-step evaluability assessment model | NA | NA | NA | NA | Logic model development | NA | NA | NA | NA | Identify stakeholders | NA | Identify and review documents | Time and other resources required | NA | Agreement to proceed | Choose an evaluability assessor | NA | NA | NA | NA |  |
| Intervention Scalability Assessment Tool | Strategic/political context | Noted, but unspecified | NA | Intervention description | NA | Effectiveness evidence supporting the scale-up | Intervention costs and benefits; fidelity and adaptation; reach and acceptability; delivery setting and workforce; implementation infrastructure; sustainability | NA | NA | NA | NA | NA | NA | NA | NA | NA | NA | NA | NA | NA |  |
| Zamboni's scalability assessment framework | NA | NA | NA | Attributes of the innovation | NA | NA | Attributes of implementers; attributes of adopting community; socio-political context; scale-up strategy | NA | NA | NA | NA | NA | NA | NA | NA | NA | NA | NA | NA | NA |  |
| Dahler-Larsen evaluability assessment framework | Existing knowledge; the context in which innovation evaluation operates | Noted, but unspecified | Clarity of goals | NA | Theory model | NA | NA | NA | NA | Roles of stakeholders | NA | Availability of reliable, trustworthy information | Techno-structure required to implement the evaluation system | NA | NA | NA | Alternatives to evaluation considered | NA | NA | Social impact or importance | |
| European Union Digital Environment for Cognitive Inclusion (DECI) evaluation planning process | NA | NA | Question definition | NA | NA | NA | NA | NA | Outcome measure definition, and measure feasibility | Stakeholders’ perspectives | Choosing a methodological approach; planning data collection; considering data analysis methods; defining expected results | NA | NA | NA | Data collection monitoring; quality management plan | NA | NA | Identify constraints and risk analysis | NA | Learn approaches from related projects | |
| Wholey 6-step evaluability assessment model | NA | NA | NA | Programme design | NA | Programme reality and plausibility | Change needs for implementation | NA | NA | Involve intended users and other key stakeholders | NA | NA | NA | NA | NA | NA | Feedback on further evaluation | NA | NA | NA |  |
| Wholey original 8-stage evaluability assessment model | NA | NA | Defining causal assumptions | Define the programme to be evaluated | Programme model development | NA | NA | Programme reality | Clarify measures and gaps identified in the programme description | Consider the perspectives of stakeholders about programme description | Collect programme information; identify options for evaluation and management | NA | Resources required | NA | Evaluation and management options | NA | Present conclusions and recommendations | NA | NA | Programme plausibility | |
| 8-step scoping framework | NA | NA | Question formulation | Understanding organisation provision | Understand work and provision of an organisation | Whether projects are suitable for evaluation | NA | NA | NA | Negotiating with project leads | NA | Use a data template; assess robustness/validity of data | NA | Ethical approval from organisations | NA | NA | Develop evaluation protocols | NA | NA | NA |  |
| Cohen's evaluation readiness guide | NA | NA | Defining causal assumptions | Programme description | Describe the logical fIow of programme operation | NA | NA | NA | Construct programme performance measures | Involving programme manager to validate the questions/objectives of programme, to assure the framework validity and to enhance its utility for decision making | Identifying data requirements; assembling the data inventory framework that provides a format for linking data with the objectives and information needs of decision makers | Identifying data requirements; assembling the data inventory framework that provides a format for linking data with the objectives and information needs of decision makers | NA | NA | NA | NA | NA | NA | NA | NA |  |
| Craig evaluability assessment framework | Existing evidence | NA | NA | NA | Theory of change | NA | NA | NA | NA | Systematic engagement with stakeholders | Develop and appraise evaluation options | Review existing data sources | NA | NA | NA | Convene working group | Make recommendations for or against evaluation | NA | NA | NA |  |
| Davies evaluability assessment framework | The institutional context | NA | NA | Applicability of evaluability assessments to portfolios of innovations | NA | NA | NA | Project boundaries and expected outputs of the evaluability assessment | NA | Engagement with stakeholders at the design stage | The availability of information | Review of the available documentation | Resources available for the assessment such as support needed, budgets | NA | NA | Choose independent third parties as the team | Develop recommendations, feedback findings to stakeholders | Excessive breadth of ambition as a risk | NA | Evaluability assessment checklists | The guidance has various informative recommendations and checklists of what factors can be considered in planning an evaluation |
| Evaluation Planning Tool (EPT – evaluationplanningtool.org) | NA | NA | NA | NA | Theory of change | NA | Pathways (including external factors) to achieve impact | NA | Using a theory of change to guide measurement and determine indicators | NA | Develop a cohesive, logical evaluation plan which includes appropriate methods to measure indicators and address the questions | Establishing a data collection plan | NA | NA | NA | NA | NA | NA | NA | NA |  |
| Leviton evaluability assessment framework | NA | NA | Clarity of (and agreement on) goals | NA | Logic model or theory of change | NA | NA | Project scope | NA | Involving intended users of the evaluation; consulting stakeholders | Exploring a range of alternative evaluation designs | Review programme documents | NA | Ethical considerations | NA | NA | Feedback to programme manager or policy maker | NA | NA | Programme reality | |
| NDC evaluability assessment framework | NA | Noted, but unspecified | NA | NA | Clarify intervention theory (goals, resources, activities, outcomes) | Plausibility of intervention model | NA | Programme boundaries | NA | Consider stakeholders' perceptions of the programme | Assess the validity of the programme | Review available programme documents | NA | NA | NA | NA | Decide about continuation | NA | NA | NA |  |
| Rutman evaluability assessment model | NA | NA | Evaluation purpose definition | Identify programme components | Theory of change; using three criteria: (1) implementable, well-defined components; (2) clearly specified goals and effects; and (3) plausible causal linkages | NA | NA | NA | Potential to perform proper measurement | Consider stakeholders' perceptions of the programme | Consider whether use of a design can provide causal and generalizable findings | Collect data on programme operation; review existing research and evaluation studies; compile information requirements | NA | NA | NA | NA | NA | NA | NA | NA |  |
| Schmidt evaluability assessment model | NA | Noted, but unspecified | Describing evaluation programme | Programme description | Programme description | NA | NA | NA | NA | NA | Construct alternatives | NA | NA | NA | Assess the extent to which the program can be evaluated | NA | Implement management decisions | NA | NA | NA |  |
| Smith 10-step evaluability assessment model | NA | NA | Defining purpose with group members | NA | Programme theory development, and plausibility assessment | NA | NA | Programme boundaries | NA | Interview stakeholders and consider their perceptions, needs and differences in perceptions | NA | Review programme documents | NA | NA | NA | Identify work group members | Conclusions and recommendations | NA | NA | NA |  |
| UNODC evaluability assessment framework | NA | Evidence needs | NA | NA | NA | NA | NA | NA | NA | Interview stakeholders | NA | Review programme documents | NA | NA | NA | NA | NA | NA | NA | NA |  |
| Van Voorhis evaluability assessment model | NA | NA | Describing purpose | NA | Theory of change | NA | NA | Purpose and scope of the assessment | NA | Interviews and focus groups of staff members and stakeholders to validate the programme design | NA | NA | NA | NA | NA | NA | Report assessment findings and make recommendations | NA | NA | NA |  |
| Vann's multimodal evaluation planning strategy | NA | Noted, but unspecified | Describing questions | Programme description | NA | NA | NA | NA | NA | NA | Selecting evaluation methods | Specify data needs, identify data sources | NA | NA | NA | NA | NA | Barriers to evaluation | NA | NA |  |
| Conceptual framework of implementability of healthcare interventions | NA | NA | NA | NA | NA | NA | Acceptability, fidelity and feasibility (influencing sustainability and scalability) | NA | NA | NA | NA | NA | NA | NA | NA | NA | NA | NA | NA | NA |  |
